# Supplementary material
Source: PubMed Central journal article supplement (PMC6511308)
Supplement: NIHMS1516269-supplement-1.pdf [file NIHMS1516269-supplement-1.pdf]

**Supplemental Figure 2: Overlap among reported middle ear symptoms**

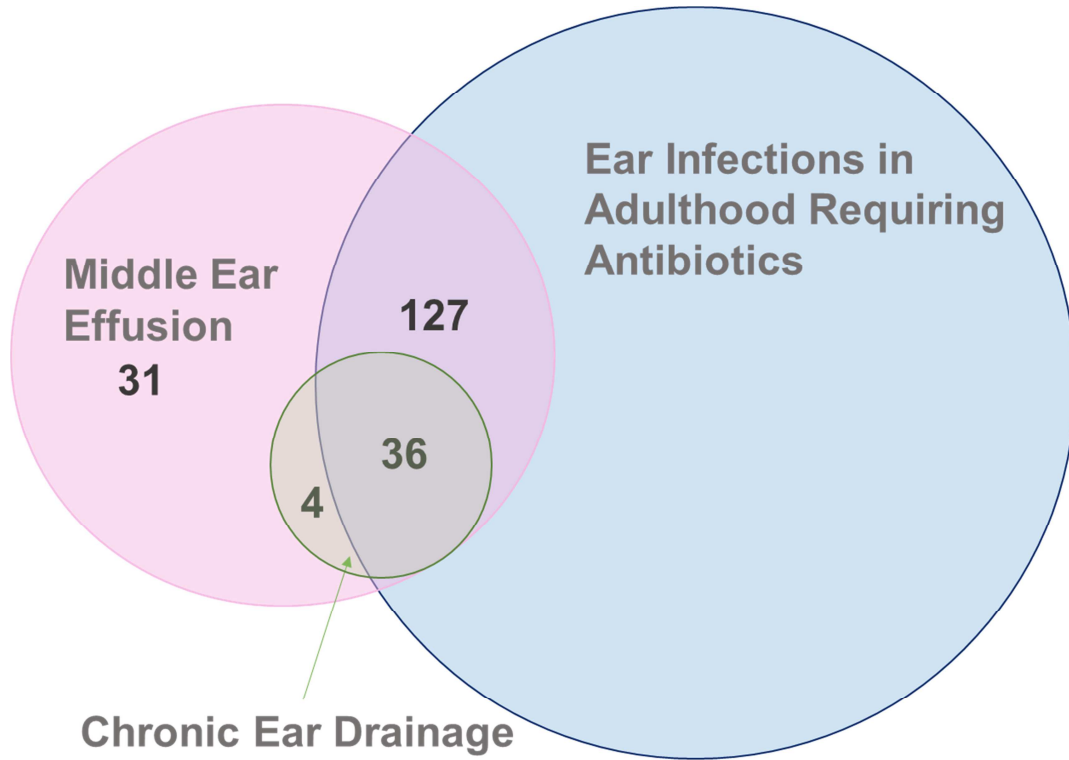

**Supplemental Figure 3: Linear Relationship between ETDQ-7 and HHIA Total Score among patients with hearing loss in AERD**

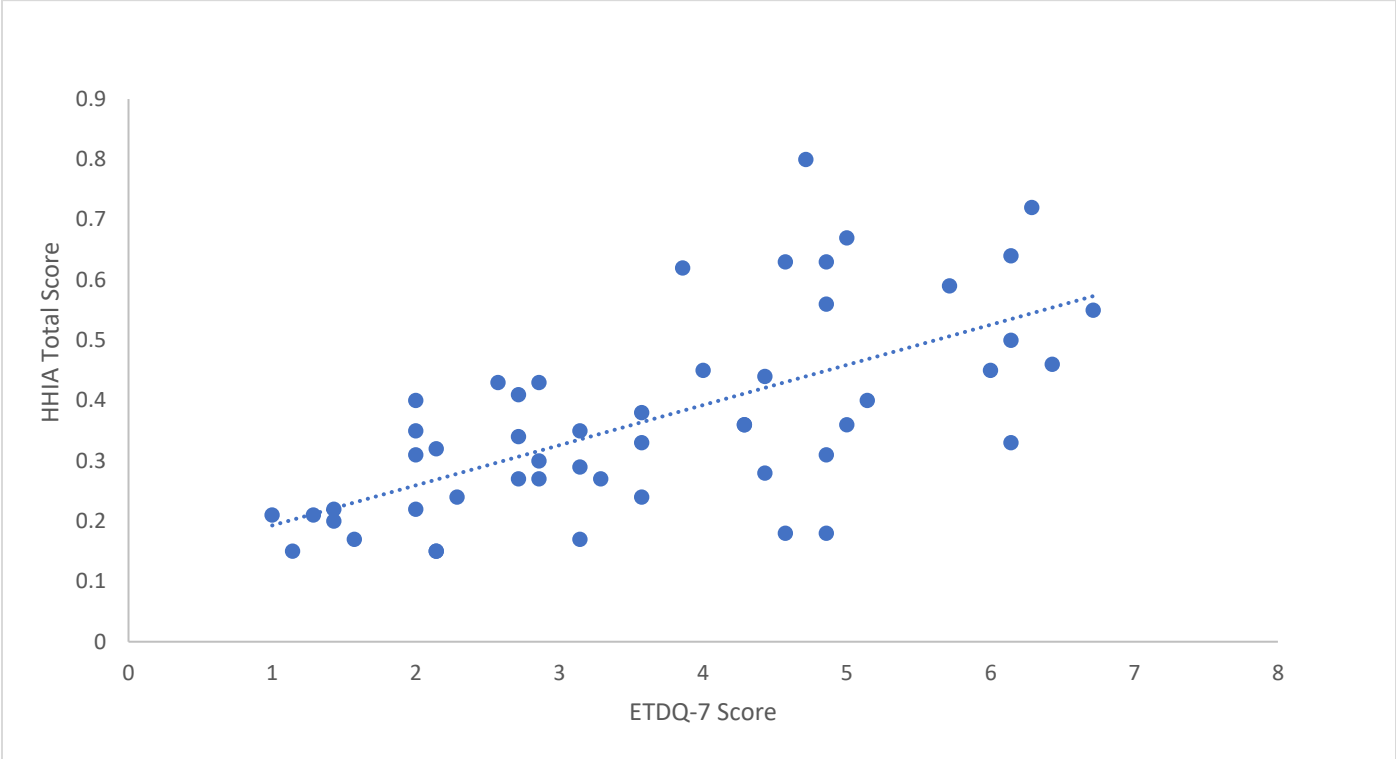

**Supplemental Figure 3 Legend:** Eustachian Tube Dysfunction 7 (ETDQ-7) questionnaire demonstrates a linear relationship with the Hearing Handicap Inventory for Adults (HHIA) total score among AERD patients with hearing loss, with Pearson's correlation coefficient 0.66 ( $p < .0001$ ).

**Supplemental Table 1: ETDQ-7 and HHIA Survey Results**

| Demographics                                                   |                       |                |
|----------------------------------------------------------------|-----------------------|----------------|
| Total Respondents                                              | 74 (28.4%)            |                |
| Prior congenital/traumatic hearing loss or loud noise exposure | 22                    |                |
| Total respondents analyzed                                     | 52                    |                |
| Males                                                          | 15 (28.8%)            |                |
| Females                                                        | 37 (71.1%)            |                |
| Age                                                            |                       |                |
| Mean                                                           | 53.7 ± 1.9            |                |
| Range                                                          | 22-75 years           |                |
| Age at Diagnosis of Asthma, years                              | 31.2 ± 2.5            |                |
| Age at Diagnosis of Nasal Polyps, years                        | 37.1 ± 2.3            |                |
| Number of Lifetime Polypectomies                               | 2.8 ± 0.4             |                |
| ETDQ-7 Results                                                 |                       |                |
| Mean Score                                                     | 3.66 ± 0.22           |                |
| Males                                                          | 3.29 ± 0.44           | p=0.28         |
| Females                                                        | 3.81 ± 0.25           |                |
| Score by Age Group                                             | ANOVA p value = .0634 |                |
| <40 years                                                      | 4.95 ± 0.58           |                |
| 40-49 years                                                    | 3.04 ± 0.32           |                |
| 50-59 years                                                    | 4.20 ± 0.64           |                |
| 60-69 years                                                    | 3.47 ± 0.36           |                |
| >70 years                                                      | 3.28 ± 0.52           |                |
| HHIA Results                                                   |                       |                |
| Total Mean Score                                               | .37 ± .02             |                |
| Males                                                          | .38 ± .02             | p=0.37         |
| Females                                                        | .34 ± .05             |                |
| Emotional Domain Mean Score                                    | .39 ± .02             |                |
| Social Domain Mean Score                                       | .34 ± .02             |                |
| HHIA Total Score by Age Group                                  | ANOVA p value = 0.012 | t-test p-value |
| <40 years                                                      | 0.56 ± 0.06           |                |
| 40-49 years                                                    | 0.32 ± 0.03           | <0.001         |
| 50-59 years                                                    | 0.38 ± 0.06           | 0.056          |
| 60-69 years                                                    | 0.34 ± 0.05           | <0.01          |
| >70 years                                                      | 0.34 ± 0.04           | <0.01          |
| HHIA Emotional Score by Age Group                              | ANOVA p value= 0.016  | t-test p-value |
| <40 years                                                      | 0.59 ± 0.07           |                |
| 40-49 years                                                    | 0.33 ± 0.04           | <0.001         |
| 50-59 years                                                    | 0.42 ± 0.07           | 0.09           |
| 60-69 years                                                    | 0.36 ± 0.04           | <0.01          |
| >70 years                                                      | 0.37 ± 0.05           | <0.01          |
| HHIA Social Score by Age Group                                 | ANOVA p value= 0.028  | t-test p-value |
| <40 years                                                      | 0.52 ± 0.08           |                |
| 40-49 years                                                    | 0.30 ± 0.04           | 0.007          |
| 50-59 years                                                    | 0.33 ± 0.05           | 0.04           |
| 60-69 years                                                    | 0.32 ± 0.04           | 0.02           |
| >70 years                                                      | 0.31 ± 0.03           | 0.01           |

Mean values +/- standard error are reported. Hearing Handicap Inventory for Adults – HHIA. Eustachian Tube Dysfunction 7 questionnaire -ETDQ-7.

### **Supplemental Figure Legends:**

**Figure E1 Legend:** Questionnaires used to ascertain presence of hearing loss, middle ear symptoms, eustachian tube dysfunction and impact of hearing loss on quality of life.

**Figure E2 Legend:** Venn diagram demonstrating significant overlap in the middle ear symptoms reported by Survey 1 Respondents. All respondents with chronic ear drainage also had either middle ear effusion or both middle ear effusion and ear infections in adulthood requiring antibiotics.

**Figure E3 Legend:** Eustachian Tube Dysfunction 7 (ETDQ-7) questionnaire demonstrates a linear relationship with the Hearing Handicap Inventory for Adults (HHIA) total score among AERD patients with hearing loss, with Pearson's correlation coefficient 0.66 ( $p < .0001$ )

### Supplemental Figure 1: Otologic manifestations survey

Have you ever been evaluated for hearing loss? Yes/No

Have you ever been diagnosed with hearing loss? Yes/No

If yes, when? \_\_\_\_\_

Right ear only? Yes/No

Left ear only? Yes/No

Both? Yes/No

What treatment have you received for your hearing loss? \_\_\_\_\_

Do you have a family history of hearing loss? Yes/No

Have you experienced vertigo (sensation that the room is spinning)? Yes/No

Do you have a history of loud noise exposure in your profession or from hobbies (manufacturing facility, rock music concerts, etc)? Yes/No

Were you born prematurely (before 37 weeks of gestation)? Yes/No

Have you experienced any prior head trauma? Yes/No

Have you been diagnosed with fluid in your ears as an adult? Yes/No

Have you ever required an incision in your ear drum (myringotomy) to drain fluid as an adult? Yes/No

If yes, when? \_\_\_\_\_

Right ear only? Yes/No

Left ear only? Yes/No

Both? Yes/No

Have you had ear tubes placed in adulthood? Yes/No

If yes, when? \_\_\_\_\_

Right ear only? Yes/No

Left ear only? Yes/No

Both? Yes/No

Have you suffered from chronic ear drainage? Yes/No

If yes, when did the chronic ear drainage start? \_\_\_\_\_

Have any treatments helped your chronic ear drainage condition? \_\_\_\_\_

What treatments have been tried and were not helpful? \_\_\_\_\_

Have you received oral antibiotics to treat a middle ear infection in adulthood? Yes/No

If yes, how many times per year on average?

less than 1 per year Yes/No

1-2 per year Yes/No

more than 3 per year Yes/No

Have you been diagnosed with polyps in your ears or on your ear drum? Yes/No

Do you have any other difficulties with your hearing or ears to report? \_\_\_\_\_

Those subjects reporting a diagnosis of hearing loss were also asked to complete the following:

1) Was your hearing loss confirmed by an audiologist or through audiologic testing? Yes/No

If no, would you be interested in having a full audiologic evaluation at BWH? Yes/No

If yes, do you have records or documentation of your audiologic evaluation? Yes/No

If yes, please upload any pertinent medical records or have them faxed.

2) The 7-item Eustachian Tube Dysfunction Questionnaire (ETDQ-7) as reported by McCoul E.D., Anand V.K., & Christos P.J. Validating the Clinical Assessment of Eustachian Tube Dysfunction: The Euctachian Tube Dysfunction Questionnaire (ETDQ-7). *Laryngoscope*. 2012 May;122(5):1137-141.

3) The Hearing Handicap Inventory Adults as reported by Newman, C. W., Weinstein, B. E., Jacobson, G. P., & Hug, G. A. The Hearing Handicap Inventory for Adults: psychometric adequacy and audiometric correlates. *Ear and Hearing*. 1990;11:430-433.
